# Supplementary material for: Classification, Prediction, and Concordance of Cognitive and Functional Progression in Patients with Mild Cognitive Impairment in the United States: A Latent Class Analysis
Source: PubMed Central journal article supplement (PMC8461667; doi:10.3233/jad-210305), 2021-08-17
Supplement: jad-82-jad210305-s001.pdf [file jad-82-jad210305-s001.pdf]

# Supplementary Material

## Classification, Prediction, and Concordance of Cognitive and Functional Progression in Patients with Mild Cognitive Impairment in the United States: A Latent Class Analysis

**Supplementary Table 1. Summary statistics of multi-class linear models<sup>1</sup>**

| Number of classes                 | AIC <sup>2</sup> | BIC <sup>2</sup> | SABIC <sup>2</sup> | Log-likelihood <sup>2</sup> | Entropy <sup>3</sup> | Smallest class size, % <sup>4</sup> |
|-----------------------------------|------------------|------------------|--------------------|-----------------------------|----------------------|-------------------------------------|
| <i>CDR-SB latent class models</i> |                  |                  |                    |                             |                      |                                     |
| 2 latent classes                  | 11,861.43        | 11,908.64        | 11,876.89          | -5,920.71                   | 0.65                 | 32.9%                               |
| 3 latent classes                  | 11,785.91        | 11,852.01        | 11,807.55          | -5,878.95                   | 0.53                 | 21.1%                               |
| 4 latent classes                  | 11,730.48        | 11,815.46        | 11,758.3           | -5,847.24                   | 0.62                 | 2.3%                                |
| <i>FAQ latent class models</i>    |                  |                  |                    |                             |                      |                                     |
| 2 latent classes                  | 10,604.97        | 10,647.41        | 10,615.67          | -5,292.49                   | 0.75                 | 35.2%                               |
| 3 latent classes                  | 10,559.63        | 10,619.05        | 10,574.61          | -5,265.82                   | 0.71                 | 13.8%                               |
| 4 latent classes                  | 10,554.05        | 10,630.45        | 10,573.31          | -5,259.03                   | 0.72                 | 6.6%                                |
| <i>MMSE latent class models</i>   |                  |                  |                    |                             |                      |                                     |
| 2 latent classes                  | 13,409.03        | 13,455.32        | 13,423.57          | -6,694.51                   | 0.61                 | 28.5%                               |
| 3 latent classes                  | 13,299.95        | 13,364.76        | 13,320.3           | -6,635.97                   | 0.59                 | 13.1%                               |
| 4 latent classes                  | 13,279.74        | 13,363.07        | 13,305.91          | -6,621.87                   | 0.53                 | 9.5%                                |

AIC, Akaike Information Criterion; BIC, Bayesian Information Criterion; CDR-SB, Clinical Dementia Rating Scale-Sum of Boxes; FAQ, Functional Activities Questionnaire; MMSE, Mini-Mental State Examination; SABIC, sample-size-adjusted BIC.

[1] Other functional forms (i.e., quadratic and cubic models) were not considered due to suboptimal separation of progression classes.

[2] Lower AIC, BIC, SABIC, and log-likelihood values indicate better model fit.

[3] Higher values of entropy (>0.80) indicate better classification quality.

[4] In a given class there should be no less than 1% of the total count.

**Supplementary Table 2. Predictors of CDR-SB class membership of progression, univariate results**

| Candidate predictor                                               | Slow progression versus No progression |              | Fast progression versus No progression |              |
|-------------------------------------------------------------------|----------------------------------------|--------------|----------------------------------------|--------------|
|                                                                   | OR (95% CI)                            | p            | OR (95% CI)                            | p            |
| Age at index date (ref: ≤70 y)                                    |                                        |              |                                        |              |
| 71-75                                                             | <b>1.95 (1.02 - 3.73)</b>              | <b>0.044</b> | 1.17 (0.60 - 2.26)                     | 0.646        |
| 76-80 y                                                           | <b>2.31 (1.27 - 4.20)</b>              | <b>0.006</b> | 1.45 (0.80 - 2.62)                     | 0.219        |
| 81-85 y                                                           | <b>2.31 (1.27 - 4.20)</b>              | <b>0.006</b> | 1.74 (0.98 - 3.10)                     | 0.060        |
| ≥86 y                                                             | <b>3.18 (1.72 - 5.85)</b>              | <b>0.000</b> | <b>3.08 (1.74 - 5.45)</b>              | <b>0.000</b> |
| Female (ref: male)                                                | <b>1.60 (1.12 - 2.27)</b>              | <b>0.009</b> | <b>1.81 (1.26 - 2.61)</b>              | <b>0.001</b> |
| Education level <sup>1</sup> (ref: Graduate school)               |                                        |              |                                        |              |
| College                                                           | 1.28 (0.81 - 2.02)                     | 0.289        | 1.46 (0.92 - 2.31)                     | 0.106        |
| Some college                                                      | <b>1.74 (1.08 - 2.79)</b>              | <b>0.023</b> | 1.39 (0.83 - 2.33)                     | 0.204        |
| High school                                                       | 1.34 (0.80 - 2.26)                     | 0.271        | 1.51 (0.90 - 2.55)                     | 0.122        |
| Some high school                                                  | 0.94 (0.44 - 2.02)                     | 0.872        | 1.13 (0.53 - 2.37)                     | 0.756        |
| Ethnicity/ race (ref: Non-Hispanic/White)                         |                                        |              |                                        |              |
| Hispanic/all races                                                | 0.95 (0.48 - 1.85)                     | 0.873        | 1.36 (0.74 - 2.53)                     | 0.323        |
| Non-Hispanic/African                                              | 0.71 (0.40 - 1.28)                     | 0.259        | 0.83 (0.47 - 1.49)                     | 0.540        |
| Other <sup>2</sup>                                                | 0.76 (0.30 - 1.94)                     | 0.564        | 0.56 (0.19 - 1.67)                     | 0.297        |
| Marital status <sup>1</sup> (ref: Married/Cohabitation)           |                                        |              |                                        |              |
| Widowed                                                           | 1.38 (0.92 - 2.07)                     | 0.116        | <b>1.79 (1.21 - 2.66)</b>              | <b>0.004</b> |
| Divorced/Separated                                                | <b>0.47 (0.25 - 0.91)</b>              | <b>0.026</b> | 0.66 (0.36 - 1.21)                     | 0.176        |
| Never married                                                     | 1.34 (0.73 - 2.47)                     | 0.348        | 0.41 (0.16 - 1.09)                     | 0.073        |
| Living situation <sup>1</sup> (ref: Live with spouse/partner)     |                                        |              |                                        |              |
| Live alone                                                        | 1.10 (0.77 - 1.58)                     | 0.598        | 1.04 (0.71 - 1.51)                     | 0.854        |
| Other <sup>3</sup>                                                | 1.38 (0.71 - 2.69)                     | 0.342        | <b>2.01 (1.08 - 3.73)</b>              | <b>0.027</b> |
| First-degree family member with cognitive impairment <sup>1</sup> | 1.17 (0.80 - 1.71)                     | 0.415        | 1.00 (0.69 - 1.46)                     | 0.982        |
| <i>APOE</i> ε4 genotype status <sup>1</sup> (ref: no copy)        |                                        |              |                                        |              |
| 1 copy                                                            | 1.12 (0.77 - 1.64)                     | 0.553        | <b>1.61 (1.11 - 2.35)</b>              | <b>0.013</b> |
| 2 copies                                                          | 1.18 (0.47 - 2.95)                     | 0.722        | 1.64 (0.68 - 3.95)                     | 0.275        |
| BMI (per point increase)                                          | 0.97 (0.94 - 1.01)                     | 0.184        | 0.97 (0.93 - 1.01)                     | 0.145        |
| History of smoking <sup>1</sup> (ref: Always non-smoker)          |                                        |              |                                        |              |
| Past smoker                                                       | 0.82 (0.58 - 1.16)                     | 0.271        | 0.87 (0.61 - 1.23)                     | 0.420        |
| Current smoker                                                    | 2.08 (0.78 - 5.55)                     | 0.143        | 0.55 (0.12 - 2.58)                     | 0.446        |
| Current alcohol abuse                                             | 1.27 (0.43 - 3.76)                     | 0.669        | 2.49 (0.99 - 6.23)                     | 0.052        |
| Atrial fibrillation                                               | 1.21 (0.71 - 2.05)                     | 0.480        | 0.92 (0.52 - 1.65)                     | 0.785        |
| Cancer <sup>1</sup>                                               | 1.73 (0.68 - 4.37)                     | 0.246        | 1.46 (0.49 - 4.36)                     | 0.497        |
| Congestive heart failure                                          | 0.47 (0.16 - 1.38)                     | 0.170        | 1.16 (0.52 - 2.58)                     | 0.722        |
| Coronary artery disease                                           | 0.79 (0.47 - 1.34)                     | 0.381        | 1.08 (0.66 - 1.77)                     | 0.746        |

|                                                                                                          |                           |              |                           |              |
|----------------------------------------------------------------------------------------------------------|---------------------------|--------------|---------------------------|--------------|
| Diabetes                                                                                                 | 0.90 (0.55 - 1.49)        | 0.695        | 1.26 (0.79 - 2.02)        | 0.331        |
| Depression                                                                                               | 1.11 (0.77 - 1.59)        | 0.585        | <b>1.74 (1.22 - 2.48)</b> | <b>0.002</b> |
| Hyperlipidemia                                                                                           | 0.86 (0.61 - 1.23)        | 0.411        | 0.78 (0.55 - 1.11)        | 0.173        |
| Hypertension                                                                                             | 1.15 (0.80 - 1.65)        | 0.460        | 1.41 (0.96 - 2.07)        | 0.079        |
| Neuropsychiatric disorders                                                                               | 0.95 (0.59 - 1.52)        | 0.818        | 0.93 (0.57 - 1.51)        | 0.774        |
| Sleep disorders                                                                                          | 1.25 (0.55 - 2.84)        | 0.594        | 0.74 (0.25 - 2.14)        | 0.573        |
| Traumatic brain injury <sup>1</sup>                                                                      | 0.52 (0.24 - 1.10)        | 0.087        | 0.97 (0.52 - 1.81)        | 0.935        |
| Any medication use at MCI diagnosis (ref: No medication use)                                             | 1.70 (0.56 - 5.11)        | 0.346        | 1.61 (0.53 - 4.86)        | 0.397        |
| §: Yes                                                                                                   |                           |              |                           |              |
| Any FDA-approved AD medication use (ref: No medication use)                                              | 1.71 (0.91 - 3.24)        | 0.097        | <b>2.84 (1.59 - 5.07)</b> | <b>0.000</b> |
| CDR-SB score <sup>4</sup> (per point increase)                                                           | <b>2.45 (1.88 - 3.18)</b> | <b>0.000</b> | <b>3.72 (2.85 - 4.84)</b> | <b>0.000</b> |
| CDR-GS score <sup>5</sup> 0.5 (ref. 0)                                                                   | <b>2.23 (1.29 - 3.87)</b> | <b>0.004</b> | <b>3.05 (1.62 - 5.73)</b> | <b>0.001</b> |
| MMSE score <sup>6</sup> (per point increase)                                                             | 0.94 (0.86 - 1.02)        | 0.117        | <b>0.83 (0.77 - 0.89)</b> | <b>0.000</b> |
| FAQ score <sup>7</sup> (per point increase)                                                              | <b>1.22 (1.12 - 1.32)</b> | <b>0.000</b> | <b>1.31 (1.21 - 1.42)</b> | <b>0.000</b> |
| NPI-Q score <sup>8</sup> (per point increase)                                                            | 1.07 (1.00 - 1.14)        | 0.052        | <b>1.13 (1.06 - 1.21)</b> | <b>0.000</b> |
| GDS score <sup>9</sup> (per point increase)                                                              | 1.04 (0.96 - 1.12)        | 0.348        | <b>1.13 (1.05 - 1.21)</b> | <b>0.001</b> |
| Dependence - Requires some assistance with basic or complex activities (ref: Able to live independently) | 1.51 (0.76 - 2.99)        | 0.237        | <b>4.80 (2.77 - 8.33)</b> | <b>0.000</b> |

AD, Alzheimer's disease; *APOE* ε4, apolipoprotein E for the ε4 allele; BMI, body mass index; CDR-GS, Clinical Dementia Rating Scale-Global Score; CDR-SB, Clinical Dementia Rating Scale-Sum of Boxes; CI, confidence interval; FAQ, Functional Activities Questionnaire; FDA, Food and Drug Administration; GDS, Geriatric Depression Scale; MMSE, Mini-Mental State Examination; MoCA, Montreal Cognitive Assessment; NPI-Q, Neuropsychiatric Inventory-Questionnaire; OR, odds ratio.

[1] The results for the "Unknown" category are not reported due to their lack of interpretability.

[2] "Other" category for ethnicity/race includes "Non-Hispanic/ Indian or Alaska Native", "Non-Hispanic/ Asian", and "Non-Hispanic/ Multiracial."

[3] "Other" category for living situation includes "Live with relative/friend" and "Live with group."

[4] CDR-SB is scored on a scale of 0-18.

[5] CDR-GS is scored on a scale of 0-3. By design, only values 0 and 0.5 are observed at index date.

[6] MMSE is scored on a scale of 0-30. MoCA scores have been mapped into the MMSE scores using a published conversion algorithm (Trzepacz, 2015). MMSE is the only studied measure in which lower scores indicate worse outcome.

[7] FAQ is scored on a scale of 0-30.

[8] NPI-Q is scored on a scale of 0-36.

[9] GDS is scored on a scale of 0-15.

**Supplementary Table 3. Predictors of FAQ class membership of progression, univariate results**

| Candidate predictor                                               | Slow progression versus No progression |              | Fast progression versus No progression |              |
|-------------------------------------------------------------------|----------------------------------------|--------------|----------------------------------------|--------------|
|                                                                   | OR (95% CI)                            | p            | OR (95% CI)                            | p            |
| Age at index date (ref: ≤70 y)                                    |                                        |              |                                        |              |
| 71-75                                                             | <b>2.73 (1.23 - 6.06)</b>              | <b>0.014</b> | 1.30 (0.46 - 3.69)                     | 0.617        |
| 76-80 y                                                           | 1.93 (0.88 - 4.24)                     | 0.100        | 1.04 (0.38 - 2.84)                     | 0.940        |
| 81-85 y                                                           | <b>2.65 (1.23 - 5.74)</b>              | <b>0.013</b> | 1.96 (0.78 - 4.90)                     | 0.152        |
| ≥86 y                                                             | <b>4.11 (1.89 - 8.94)</b>              | <b>0.000</b> | <b>5.66 (2.40 - 13.32)</b>             | <b>0.000</b> |
| Female (ref: male)                                                | <b>1.69 (1.07 - 2.66)</b>              | <b>0.025</b> | <b>2.06 (1.16 - 3.67)</b>              | <b>0.014</b> |
| Education level <sup>1</sup> (ref: Graduate school)               |                                        |              |                                        |              |
| College                                                           | 0.97 (0.55 - 1.70)                     | 0.908        | 0.88 (0.42 - 1.84)                     | 0.734        |
| Some college                                                      | 1.71 (0.96 - 3.04)                     | 0.068        | 1.82 (0.90 - 3.71)                     | 0.097        |
| High school                                                       | 1.04 (0.53 - 2.03)                     | 0.904        | 1.89 (0.92 - 3.91)                     | 0.084        |
| Some high school                                                  | 0.92 (0.32 - 2.65)                     | 0.876        | 0.67 (0.14 - 3.10)                     | 0.607        |
| Ethnicity/ race (ref: Non-Hispanic/ White)                        |                                        |              |                                        |              |
| Hispanic/all races                                                | 1.10 (0.41 - 2.91)                     | 0.854        | 0.81 (0.23 - 2.88)                     | 0.744        |
| Non-Hispanic/African American                                     | 0.70 (0.34 - 1.46)                     | 0.345        | <b>0.21 (0.05 - 0.88)</b>              | <b>0.033</b> |
| Other <sup>2</sup>                                                | 1.00 (0.31 - 3.20)                     | 0.995        | 0.37 (0.05 - 2.90)                     | 0.342        |
| Marital status <sup>1</sup> (ref: Married/ Cohabitation)          |                                        |              |                                        |              |
| Widowed                                                           | 1.51 (0.92 - 2.46)                     | 0.101        | <b>2.71 (1.56 - 4.72)</b>              | <b>0.000</b> |
| Divorced/Separated                                                | 0.75 (0.37 - 1.50)                     | 0.414        | 0.47 (0.16 - 1.41)                     | 0.179        |
| Never married                                                     | 0.76 (0.32 - 1.84)                     | 0.547        | 0.21 (0.03 - 1.58)                     | 0.129        |
| Living situation <sup>1</sup> (ref: Live with spouse/partner)     |                                        |              |                                        |              |
| Live alone                                                        | 1.09 (0.70 - 1.70)                     | 0.697        | 1.33 (0.76 - 2.32)                     | 0.317        |
| Other <sup>3</sup>                                                | 1.59 (0.72 - 3.51)                     | 0.250        | <b>2.84 (1.21 - 6.66)</b>              | <b>0.016</b> |
| First-degree family member with cognitive impairment <sup>1</sup> | 1.42 (0.88 - 2.31)                     | 0.153        | 0.65 (0.38 - 1.10)                     | 0.108        |
| <i>APOE</i> ε4 genotype status <sup>1</sup> (ref: no copy)        |                                        |              |                                        |              |
| 1 copy                                                            | 1.59 (1.00 - 2.53)                     | 0.052        | <b>1.83 (1.05 - 3.17)</b>              | <b>0.033</b> |
| 2 copies                                                          | 1.32 (0.45 - 3.86)                     | 0.612        | 1.80 (0.55 - 5.85)                     | 0.328        |
| BMI (per point increase)                                          | 0.97 (0.93 - 1.02)                     | 0.227        | <b>0.93 (0.87 - 1.00)</b>              | <b>0.041</b> |
| History of smoking <sup>1</sup> (ref: Always non-smoker)          |                                        |              |                                        |              |
| Past smoker                                                       | 0.86 (0.56 - 1.33)                     | 0.508        | 0.73 (0.43 - 1.24)                     | 0.245        |
| Current smoker                                                    | 0.52 (0.11 - 2.43)                     | 0.406        | 1.21 (0.32 - 4.61)                     | 0.775        |
| Current alcohol abuse                                             | 0.94 (0.25 - 3.54)                     | 0.928        | 0.51 (0.06 - 4.06)                     | 0.522        |
| Atrial fibrillation                                               | 0.90 (0.43 - 1.91)                     | 0.791        | 0.88 (0.35 - 2.21)                     | 0.792        |
| Cancer <sup>1</sup>                                               | 1.58 (0.45 - 5.51)                     | 0.474        | 2.28 (0.62 - 8.38)                     | 0.214        |

|                                                                                                                   |                           |              |                            |              |
|-------------------------------------------------------------------------------------------------------------------|---------------------------|--------------|----------------------------|--------------|
| Congestive heart failure                                                                                          | 0.46 (0.10 - 2.10)        | 0.317        | 1.16 (0.32 - 4.23)         | 0.820        |
| Coronary artery disease                                                                                           | 0.71 (0.35 - 1.44)        | 0.345        | 1.82 (0.95 - 3.51)         | 0.072        |
| Diabetes                                                                                                          | 1.02 (0.53 - 1.95)        | 0.959        | 1.82 (0.93 - 3.57)         | 0.081        |
| Depression                                                                                                        | 1.22 (0.78 - 1.91)        | 0.376        | 1.17 (0.68 - 2.01)         | 0.567        |
| Hyperlipidemia                                                                                                    | 0.80 (0.52 - 1.23)        | 0.309        | 0.90 (0.53 - 1.52)         | 0.688        |
| Hypertension                                                                                                      | 1.01 (0.65 - 1.56)        | 0.981        | 1.62 (0.92 - 2.87)         | 0.097        |
| Neuropsychiatric disorders                                                                                        | 0.73 (0.39 - 1.37)        | 0.326        | 1.08 (0.54 - 2.15)         | 0.827        |
| Sleep disorders                                                                                                   | 1.02 (0.32 - 3.24)        | 0.978        | 0.61 (0.16 - 2.38)         | 0.477        |
| Traumatic brain injury <sup>1</sup>                                                                               | 0.87 (0.40 - 1.87)        | 0.721        | 0.89 (0.35 - 2.28)         | 0.813        |
| Any medication use at MCI diagnosis<br>(ref: No medication use)                                                   | 2.16 (0.48 - 9.82)        | 0.317        | 2.66 (0.34 - 20.78)        | 0.351        |
| Any FDA-approved AD medication<br>use (ref: No medication use)                                                    | 1.84 (0.81 - 4.18)        | 0.145        | <b>3.58 (1.58 - 8.08)</b>  | <b>0.002</b> |
| CDR-SB score <sup>4</sup> (per point increase)                                                                    | <b>1.61 (1.18 - 2.21)</b> | <b>0.003</b> | <b>2.96 (2.12 - 4.13)</b>  | <b>0.000</b> |
| CDR-GS score <sup>5</sup> 0.5 (ref. 0)                                                                            | 1.60 (0.89 - 2.90)        | 0.117        | <b>5.82 (1.78 - 19.06)</b> | <b>0.004</b> |
| MMSE score <sup>6</sup> (per point increase)                                                                      | <b>0.87 (0.78 - 0.97)</b> | <b>0.010</b> | <b>0.74 (0.66 - 0.83)</b>  | <b>0.000</b> |
| FAQ score <sup>7</sup> (per point increase)                                                                       | <b>1.35 (1.20 - 1.52)</b> | <b>0.000</b> | <b>1.81 (1.59 - 2.06)</b>  | <b>0.000</b> |
| NPI-Q score <sup>8</sup> (per point increase)                                                                     | 1.07 (0.98 - 1.17)        | 0.115        | <b>1.15 (1.05 - 1.26)</b>  | <b>0.002</b> |
| GDS score <sup>9</sup> (per point increase)                                                                       | 1.09 (0.99 - 1.19)        | 0.072        | <b>1.16 (1.04 - 1.28)</b>  | <b>0.006</b> |
| Dependence - Requires some<br>assistance with basic or complex<br>activities (ref: Able to live<br>independently) | 2.29 (0.97 - 5.37)        | 0.058        | <b>4.93 (2.14 - 11.33)</b> | <b>0.000</b> |

---

AD, Alzheimer's disease; APOE ε4, apolipoprotein E for the ε4 allele; BMI, body mass index; CDR-GS, Clinical Dementia Rating Scale-Global Score; CDR-SB, Clinical Dementia Rating Scale-Sum of Boxes; CI, confidence interval; FAQ, Functional Activities Questionnaire; FDA, Food and Drug Administration; GDS, Geriatric Depression Scale; MMSE, Mini-Mental State Examination; MoCA, Montreal Cognitive Assessment; NPI-Q, Neuropsychiatric Inventory-Questionnaire; OR: odds ratio.

[1] The results for the "Unknown" category are not reported due to their lack of interpretability.

[2] "Other" category for ethnicity/race includes "Non-Hispanic/ Indian or Alaska Native", "Non-Hispanic/ Asian", and "Non-Hispanic/ Multiracial."

[3] "Other" category for living situation includes "Live with relative/friend" and "Live with group."

[4] CDR-SB is scored on a scale of 0-18.

[5] CDR-GS is scored on a scale of 0-3. By design, only values 0 and 0.5 are observed at index date.

[6] MMSE is scored on a scale of 0-30. MoCA scores have been mapped into the MMSE scores using a published conversion algorithm (Trzepacz, 2015). MMSE is the only studied measure in which lower scores indicate worse outcome.

[7] FAQ is scored on a scale of 0-30.

[8] NPI-Q is scored on a scale of 0-36.

[9] GDS is scored on a scale of 0-15.

**Supplementary Table 4. CDR-SB components at index among the overall sample and progression classes**

|                                                      | Overall sample<br>N = 830 | CDR-SB progression classes |                             |                             | FAQ progression classes   |                             |                            | MMSE progression classes  |                             |                            |
|------------------------------------------------------|---------------------------|----------------------------|-----------------------------|-----------------------------|---------------------------|-----------------------------|----------------------------|---------------------------|-----------------------------|----------------------------|
|                                                      |                           | No progression<br>N = 469  | Slow progression<br>N = 186 | Fast progression<br>N = 175 | No progression<br>N = 328 | Slow progression<br>N = 116 | Fast progression<br>N = 71 | No progression<br>N = 363 | Slow progression<br>N = 295 | Fast progression<br>N = 99 |
| <b>CDR-SB Components at MCI diagnosis, mean (SD)</b> |                           |                            |                             |                             |                           |                             |                            |                           |                             |                            |
| Memory                                               | 0.5 (0.2)                 | 0.4 (0.2)                  | 0.5 (0.2)                   | 0.5 (0.3)                   | 0.4 (0.2)                 | 0.5 (0.2)                   | 0.5 (0.2)                  | 0.4 (0.2)                 | 0.5 (0.2)                   | 0.5 (0.2)                  |
| Orientation                                          | 0.1 (0.2)                 | 0.1 (0.2)                  | 0.1 (0.2)                   | 0.2 (0.3)                   | 0.1 (0.2)                 | 0.1 (0.2)                   | 0.2 (0.3)                  | 0.1 (0.2)                 | 0.1 (0.2)                   | 0.2 (0.3)                  |
| Judgement/problem solving                            | 0.2 (0.3)                 | 0.1 (0.2)                  | 0.2 (0.3)                   | 0.3 (0.3)                   | 0.1 (0.2)                 | 0.2 (0.3)                   | 0.3 (0.3)                  | 0.2 (0.3)                 | 0.2 (0.3)                   | 0.2 (0.2)                  |
| Community affairs                                    | 0.1 (0.2)                 | 0.0 (0.1)                  | 0.1 (0.2)                   | 0.2 (0.2)                   | 0.0 (0.1)                 | 0.1 (0.2)                   | 0.2 (0.2)                  | 0.1 (0.2)                 | 0.1 (0.2)                   | 0.1 (0.2)                  |
| Home and hobbies                                     | 0.1 (0.2)                 | 0.0 (0.2)                  | 0.1 (0.2)                   | 0.2 (0.3)                   | 0.0 (0.2)                 | 0.1 (0.2)                   | 0.2 (0.3)                  | 0.1 (0.2)                 | 0.1 (0.2)                   | 0.1 (0.2)                  |
| Personal care                                        | 0.0 (0.1)                 | 0.0 (0.0)                  | 0.0 (0.1)                   | 0.0 (0.2)                   | 0.0 (0.1)                 | 0.0 (0.0)                   | 0.0 (0.2)                  | 0.0 (0.1)                 | 0.0 (0.1)                   | 0.0 (0.1)                  |

CDR-SB, Clinical Dementia Rating Scale-Sum of Boxes (scores for each component ranges from 0 to 3, with higher values indicating worse cognition); FAQ, Functional Activities Questionnaire; MCI, mild cognitive impairment; MMSE, Mini-Mental State Examination; SD, standard deviation.

**Supplementary Table 5. MCI type at index among the overall sample and progression classes**

|                                    | Overall sample<br>N = 830 | CDR -SB progression classes |                             |                             | FAQ progression classes   |                             |                            | MMSE progression classes  |                             |                            |
|------------------------------------|---------------------------|-----------------------------|-----------------------------|-----------------------------|---------------------------|-----------------------------|----------------------------|---------------------------|-----------------------------|----------------------------|
|                                    |                           | No progression<br>N = 469   | Slow progression<br>N = 186 | Fast progression<br>N = 175 | No progression<br>N = 328 | Slow progression<br>N = 116 | Fast progression<br>N = 71 | No progression<br>N = 363 | Slow progression<br>N = 295 | Fast progression<br>N = 99 |
| <b>MCI type, n (%)</b>             |                           |                             |                             |                             |                           |                             |                            |                           |                             |                            |
| Amnestic MCI - single domain       | 391 (47.1%)               | 225 (48.0%)                 | 80 (43.0%)                  | 86 (49.1%)                  | 165 (50.3%)               | 60 (51.7%)                  | 37 (52.1%)                 | 175 (48.2%)               | 138 (46.8%)                 | 46 (46.5%)                 |
| Amnestic MCI - multiple domain     | 319 (38.4%)               | 175 (37.3%)                 | 77 (41.4%)                  | 67 (38.3%)                  | 116 (35.4%)               | 45 (38.8%)                  | 26 (36.6%)                 | 130 (35.8%)               | 123 (41.7%)                 | 42 (42.4%)                 |
| Non-amnestic MCI - single domain   | 86 (10.4%)                | 52 (11.1%)                  | 21 (11.3%)                  | 13 (7.4%)                   | 38 (11.6%)                | 4 (3.4%)                    | 8 (11.3%)                  | 44 (12.1%)                | 23 (7.8%)                   | 5 (5.1%)                   |
| Non-amnestic MCI - multiple domain | 34 (4.1%)                 | 17 (3.6%)                   | 8 (4.3%)                    | 9 (5.1%)                    | 9 (2.7%)                  | 7 (6.0%)                    | 0 (0.0%)                   | 14 (3.9%)                 | 11 (3.7%)                   | 6 (6.1%)                   |

CDR-SB, Clinical Dementia Rating Scale-Sum of Boxes; FAQ, Functional Activities Questionnaire; MCI, mild cognitive impairment; MMSE, Mini-Mental State Examination

**Supplementary Table 6. Sample characteristics for MMSE progression classes**

|                                                             | MMSE progression classes  |                             |                            |
|-------------------------------------------------------------|---------------------------|-----------------------------|----------------------------|
|                                                             | No progression<br>N = 363 | Slow progression<br>N = 295 | Fast progression<br>N = 99 |
| <b>Socio-demographic characteristics</b>                    |                           |                             |                            |
| Age (y), mean (SD)                                          | 76.3 (8.2)                | 80.0 (8.2)                  | 79.3 (10.1)                |
| Male, n (%)                                                 | 162 (44.6)                | 118 (40.0)                  | 44 (44.4)                  |
| At least some college education, n (%)                      | 312 (86.0)                | 215 (72.9)                  | 58 (58.6)                  |
| Non-Hispanic white, n (%)                                   | 309 (85.1)                | 217 (73.6)                  | 63 (63.6)                  |
| Married, n (%)                                              | 216 (59.5)                | 147 (49.8)                  | 60 (60.6)                  |
| Live with spouse/partner, n (%)                             | 213 (58.7)                | 144 (48.8)                  | 59 (59.6)                  |
| <b>Clinical characteristics</b>                             |                           |                             |                            |
| BMI, mean (SD)                                              | 26.4 (4.8)                | 25.6 (5.0)                  | 26.4 (5.3)                 |
| First-degree family member with cognitive impairment, n (%) | 237 (65.3)                | 173 (58.6)                  | 61 (61.6)                  |
| At least one copy of the <i>APOE ε4</i> gene, n (%)         | 119 (32.8)                | 115 (39.0)                  | 50 (50.6)                  |
| Any FDA-approved AD medication use, n (%) ‡                 | 23 (6.3)                  | 23 (7.8)                    | 15 (15.2)                  |
| <b>Selected comorbidities</b>                               |                           |                             |                            |
| Hyperlipidemia, n (%)                                       | 227 (62.5)                | 187 (63.4)                  | 64 (64.6)                  |
| Hypertension, n (%)                                         | 219 (60.3)                | 212 (71.9)                  | 75 (75.8)                  |
| Depression, n (%)                                           | 142 (39.1)                | 96 (32.5)                   | 32 (32.3)                  |
| Neuropsychiatric disorders, n (%)                           | 66 (18.2)                 | 43 (14.6)                   | 11 (11.1)                  |
| Coronary artery disease, n (%)                              | 45 (12.4)                 | 47 (15.9)                   | 13 (13.1)                  |
| Diabetes, n (%)                                             | 43 (11.8)                 | 45 (15.3)                   | 21 (21.2)                  |
| Atrial fibrillation, n (%)                                  | 38 (10.5)                 | 31 (10.5)                   | 8 (8.1)                    |
| Traumatic brain injury, n (%)                               | 32 (8.8)                  | 20 (6.8)                    | 4 (4.0)                    |
| Sleep disorders, n (%)                                      | 34 (9.4)                  | 11 (3.7)                    | 3 (3.0)                    |
| Cancer, n (%) †                                             | 16 (4.4)                  | 7 (2.4)                     | 6 (6.1)                    |
| Congestive heart failure, n (%)                             | 10 (2.8)                  | 16 (5.4)                    | 5 (5.1)                    |
| <b>Questionnaire/scale statistics</b>                       |                           |                             |                            |
| CDR-SB score at MCI diagnosis, mean (SD)                    | 0.8 (0.7)                 | 1.0 (0.8)                   | 1.1 (0.9)                  |
| FAQ score at MCI diagnosis, mean (SD)                       | 1.2 (2.4)                 | 1.7 (3.0)                   | 2.5 (3.6)                  |
| MMSE score at MCI diagnosis, mean (SD)                      | 28.9 (1.2)                | 27.3 (1.6)                  | 24.6 (3.0)                 |
| CDR-GS score at MCI diagnosis, mean (SD)                    | 0.4 (0.2)                 | 0.5 (0.1)                   | 0.5 (0.1)                  |
| NPI-Q score at MCI diagnosis, mean (SD)                     | 1.6 (2.4)                 | 1.8 (2.9)                   | 1.9 (3.2)                  |
| GDS score at MCI diagnosis, mean (SD)                       | 1.8 (2.2)                 | 2.2 (2.5)                   | 2.4 (2.4)                  |
| Able to live independently, n (%)                           | 344 (94.8)                | 265 (89.8)                  | 83 (83.8)                  |
| <b>Follow-up</b>                                            |                           |                             |                            |
| Years of follow-up, mean (SD)                               | 4.0 (2.7)                 | 3.5 (2.2)                   | 2.9 (1.9)                  |
| Number of NACC visits pre- and post-index date, mean (SD)   | 7.5 (2.9)                 | 7.0 (2.7)                   | 6.8 (2.3)                  |

‡FDA-approved AD medications include donepezil, galantamine, memantine, and rivastigmine.

†A high proportion of participants in the overall sample (77.1%) had unknown cancer status.



AD, Alzheimer's disease; *APOE*  $\epsilon 4$ ,  $\epsilon 4$  allele of the apolipoprotein E gene; BMI, body mass index; CDR-GS, Clinical Dementia Rating Scale-Global Score (scores range from 0-3, with higher values indicating worse cognition; all patients had a score  $\leq 0.5$  at the MCI diagnosis); CDR-SB, Clinical Dementia Rating Scale-Sum of Boxes; 0-18, higher values indicate worse cognition; all participants had a score  $\leq 4$  at the MCI diagnosis; CDR-GS, Clinical Dementia Rating Scale-Global Score; 0-3, higher values indicate worse cognition; all participants had a score  $\leq 0.5$  at the MCI diagnosis; FAQ, Functional Activities Questionnaire; 0-30, higher values indicate worse function; FDA, Food and Drug Administration; GDS, Geriatric Depression Scale (scores range from 0-15, with higher values indicating more advanced depression); MCI, mild cognitive impairment; MMSE, Mini-Mental State Examination; 0-30, lower values indicate worse cognition; NPI-Q, Neuropsychiatric Inventory-Questionnaire (scores range from 0-36, with higher values indicating worse neuropsychiatric symptoms); SD, standard deviation.

**Supplementary Figure 1. Observed individual and predicted growth trajectories for the 3-class MMSE model**

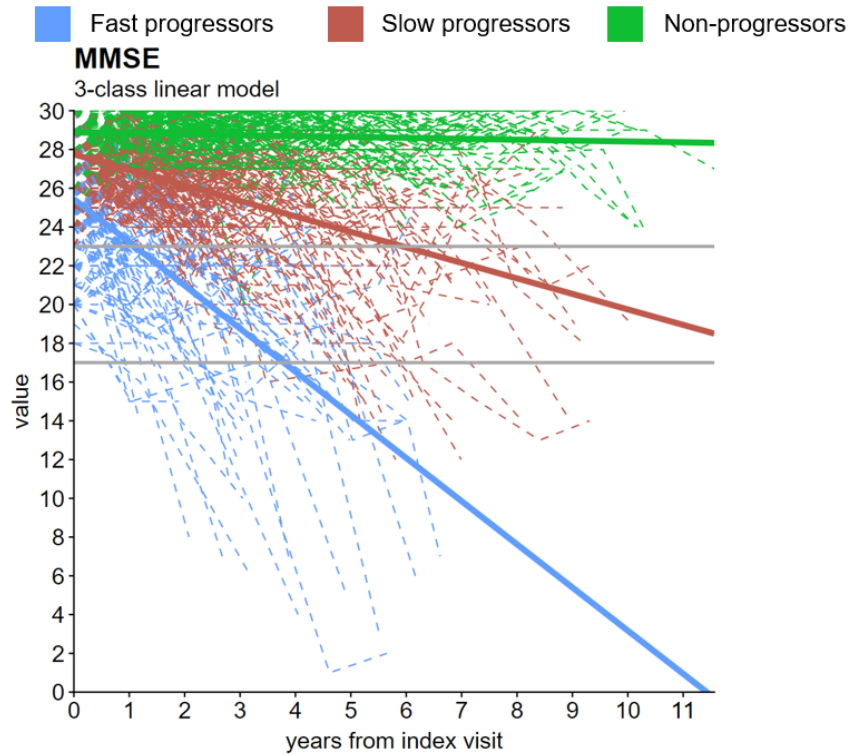

MMSE, Mini-Mental State Examination; MoCA, Montreal Cognitive Assessment.

[1] MoCA scores have been mapped into the MMSE scores using a published conversion algorithm (Trzepacz, 2015).

[2] Score ranges from 0 to 30. Lower values indicate worse cognition: 24 - 30 = No cognitive impairment; 18 - 23 = Mild cognitive impairment; 0 - 17 = Severe cognitive impairment.

[3] These models were run using the latent class mixed models (lcmm) package in R. Trajectories are based on lcmm's predictY function.

**Supplementary Figure 2. Class assignment concordance between CDR-SB and MMSE, 3-class linear models**

| <b>N = 757</b>                    |             |
|-----------------------------------|-------------|
| Same class assignment, N (%)      | 424 (56.0%) |
| Differing class assignment, N (%) | 333 (44.0%) |

| <b>CDR-SB versus MMSE<br/>3-class linear concordance</b>         |                         | <b>Number of participants per assigned classes based on CDR-SB</b> |                         |                         |              |
|------------------------------------------------------------------|-------------------------|--------------------------------------------------------------------|-------------------------|-------------------------|--------------|
|                                                                  |                         | <b>No progression</b>                                              | <b>Slow progression</b> | <b>Fast progression</b> | <b>Total</b> |
| <b>Number of participants per assigned classes based on MMSE</b> | <b>No progression</b>   | <b>278 (36.7%)</b>                                                 | 61 (8.1%)               | 24 (3.2%)               | <b>363</b>   |
|                                                                  | <b>Slow progression</b> | 128 (16.9%)                                                        | <b>92 (12.2%)</b>       | 75 (9.9%)               | <b>295</b>   |
|                                                                  | <b>Fast progression</b> | 24 (3.2%)                                                          | 21 (2.8%)               | <b>54 (7.1%)</b>        | <b>99</b>    |
|                                                                  | <b>Total</b>            | <b>430</b>                                                         | <b>174</b>              | <b>153</b>              | <b>757</b>   |

21

757

CDR-SB, Clinical Dementia Rating Scale-Sum of Boxes; MMSE, Mini-Mental State Examination. There were 757 participants who had both CDR-SB and MMSE scores available in the data.
